# Supplementary material for: Anti-Obesity Effect and Mechanism of Chitooligosaccharides Were Revealed Based on Lipidomics in Diet-Induced Obese Mice
Source: MDPI journal article supplement (doi:10.3390/molecules28145595), 2023-07-23
Supplement: s1 [file s1]

## Supporting Material

During the experiment, we carried out quality control on the samples. The results are shown below:

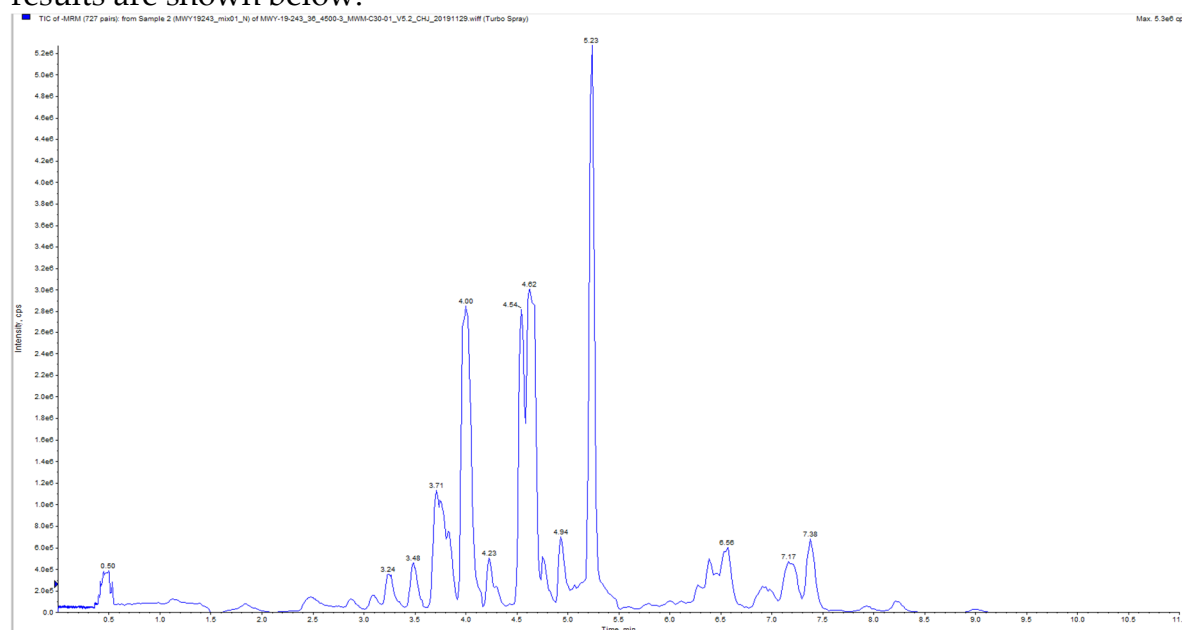

Figure S1: QC sample mass spectrometry analysis of total ion flow (Abcissa: retention time; Ordinate: ion current intensity)

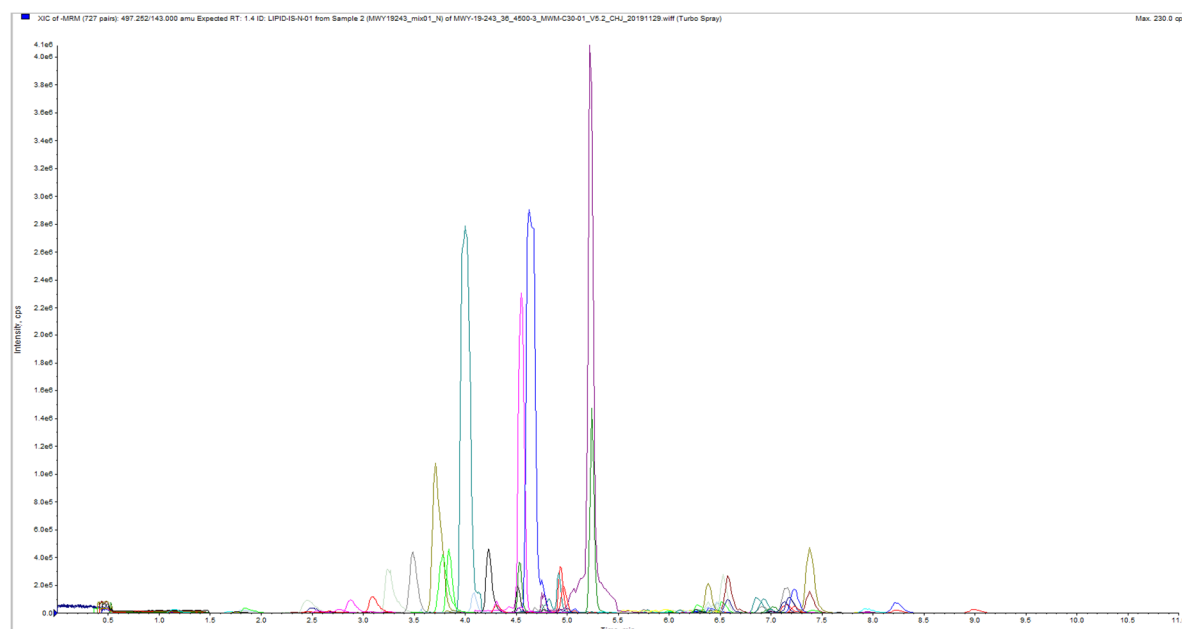

Figure S2: Detected multimodal plot of MRM metabolites (Abcissa: retention time; Ordinate: ion current intensity)

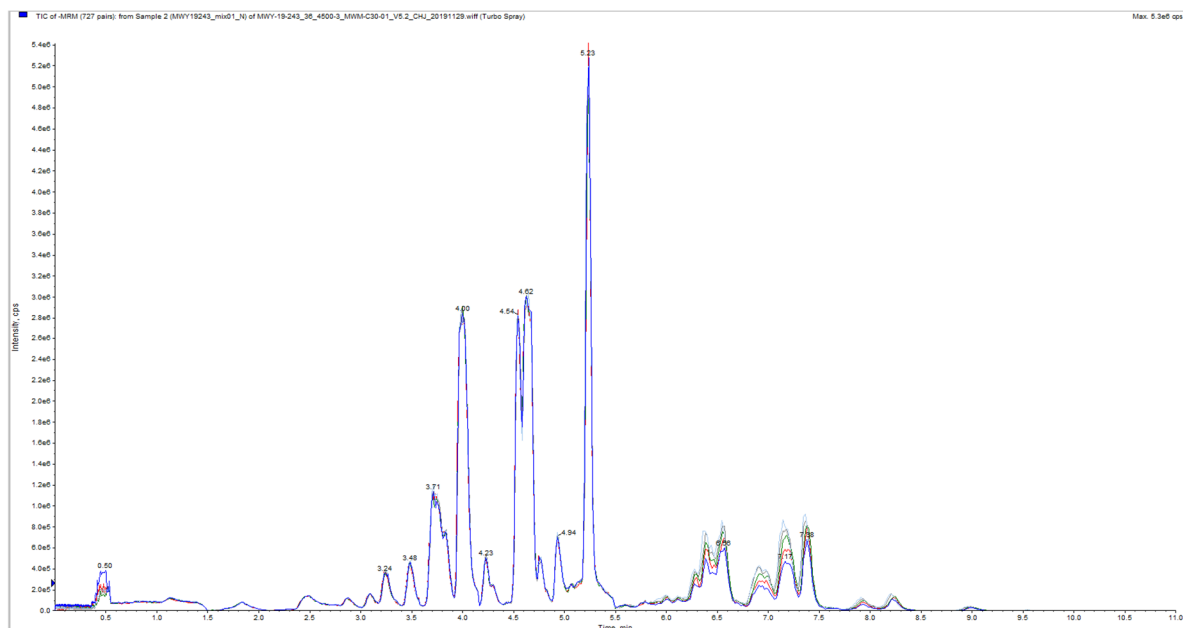

Figure S3: TIC overlay of QC sample with mass spectrometry detection (Abcissa: retention time; Ordinate: ion flow intensity)
